# Supplementary material for: HOMO inversion as a strategy for improving the light-absorption properties of Fe(ii) chromophores
Source: PubMed Central journal article supplement — Chem Sci. 2017 Oct 4;8(12):8115–26. doi: 10.1039/c7sc02926h (PMC5855294; doi:10.1039/c7sc02926h), 2017-10-04
Supplement: SC-008-C7SC02926H-s002.pdf [file SC-008-C7SC02926H-s002.pdf]

### Supplementary Information for:

## HOMO Inversion as a Strategy for Improving the Light-Absorption Properties of Fe(II) Chromophores

*Sriparna Mukherjee,<sup>a</sup> David E. Torres<sup>b</sup> and Elena Jakubikova<sup>a,\*</sup>*

<sup>a</sup> Department of Chemistry, North Carolina State University, Raleigh, NC 27695, USA.

<sup>b</sup> Wake STEM Early College High School, 715 Barbour Dr., Raleigh, NC 27603, USA.

Current address: North Carolina State University, Raleigh, NC 27695

\* E-mail: [ejakubi@ncsu.edu](mailto:ejakubi@ncsu.edu).

### Table of Contents

|                                                                                                                                                                                                                                                                                                                         |   |
|-------------------------------------------------------------------------------------------------------------------------------------------------------------------------------------------------------------------------------------------------------------------------------------------------------------------------|---|
| <b>Figure S1.</b> Frontier KS orbitals of $[\text{Fe}(\text{tpy})_2]^{2+}$ complexes substituted by carboxylic acid groups at the 4' ( <b>1a</b> ), 4,4'' ( <b>3a</b> ), and 5,5'' ( <b>4a</b> ) positions. ....                                                                                                        | 4 |
| <b>Figure S2.</b> Top: HOMO and LUMO energies, bottom: HOMO-LUMO gaps (red), and average % of electron density ( $\% \rho_{\text{el}}$ ) on the linker group in doubly degenerate LUMO (blue) for <b>2a-f</b> series of complexes. ....                                                                                 | 5 |
| <b>Figure S3.</b> Top: HOMO and LUMO energies, bottom: HOMO-LUMO gaps (red), and average % of electron density ( $\% \rho_{\text{el}}$ ) on the linker group in doubly degenerate LUMO (blue) for <b>3a-e</b> series of complexes. ....                                                                                 | 5 |
| <b>Figure S4.</b> Top: HOMO and LUMO energies, bottom: HOMO-LUMO gaps (red), and average % of electron density ( $\% \rho_{\text{el}}$ ) on the linker group in doubly degenerate LUMO (blue) for <b>4a-e</b> series of complexes. ....                                                                                 | 6 |
| <b>Figure S5.</b> Degenerate LUMO orbitals for <b>1b-f</b> with carboxylic acid (A) on the center pyridines and donor groups on the side pyridines. Surfaces are constructed with 0.04 isovalue. ....                                                                                                                   | 6 |
| <b>Figure S6.</b> Average percent of electron density on a single donor group for the 21 lowest energy unoccupied orbitals near the frontier region for the <b>1c</b> , <b>1e</b> , and <b>1f</b> . Note that average density equal to 25% means that the MO is fully localized on the donor groups. ....               | 7 |
| <b>Figure S7.</b> First singlet excitation of <b>1a-f</b> obtained from the TD-DFT that has contribution mostly from the HOMO to LUMO transition. ....                                                                                                                                                                  | 7 |
| <b>Figure S8.</b> Lowest energy singlet excitations of <b>1a-f</b> obtained from TD-DFT. The shaded plots indicate transitions from HOMO into an $e_g^*$ orbital. ....                                                                                                                                                  | 8 |
| <b>Figure S9.</b> Left: the KS orbital diagram of pyridine, <b>5b</b> and <b>b</b> . Right: the KS orbital diagram of the pyridine, <b>5c</b> and <b>c</b> . Interactions between the orbitals are shown with dashed lines. LUMO orbitals are marked in green. ....                                                     | 8 |
| <b>Figure S10.</b> The KS orbital diagrams of <b>5c</b> , <b>6</b> , <b>5d</b> and <b>5e</b> derived from the interaction of pyridine with their respective donor groups. The relevant orbitals are highlighted. Interactions between the orbitals are shown with dashed lines. LUMO orbitals are marked in green. .... | 9 |

|                                                                                                                                                                                                                                                                                                                                                                                                                                                                                                                                   |    |
|-----------------------------------------------------------------------------------------------------------------------------------------------------------------------------------------------------------------------------------------------------------------------------------------------------------------------------------------------------------------------------------------------------------------------------------------------------------------------------------------------------------------------------------|----|
| <b>Figure S11.</b> The KS energy levels of pyridine and the donor groups (furan, thiophene, selenophene). The red lines are the orbitals that are interacting when the donor group is attached to the pyridine at its 4 position.....                                                                                                                                                                                                                                                                                             | 9  |
| <b>Figure S12.</b> The effect of the change in the dihedral (marked in green) on the energy levels of <b>5b</b> (left) and <b>5c</b> (right). The red lines are the KS orbitals involved in interaction.....                                                                                                                                                                                                                                                                                                                      | 10 |
| <b>Figure S13.</b> Left: the KS orbital energies of <b>5c</b> and <b>6</b> . Right: schematics of KS orbitals for the energy levels highlighted on the left in the order of increasing energy.....                                                                                                                                                                                                                                                                                                                                | 10 |
| <b>Figure S14.</b> Electron density on Fe ( $\rho^{\text{Fe}}$ ) of the 21 higher energy occupied orbitals near the frontier region for the <b>1a-d</b> . The KS orbitals with electron distribution $\geq 20\%$ are shown in red and among these the doubly degenerate orbitals are labeled as ‘*’.....                                                                                                                                                                                                                          | 11 |
| <b>Figure S15.</b> Excited states for <b>1a</b> . Excited states were characterized for wavelengths $> 350$ nm with oscillator strength ( $f_{osc}$ ) $\geq 0.01$ . Only those hole-particle pairs were considered whose contributions add up to $\geq 70\%$ .....                                                                                                                                                                                                                                                                | 11 |
| <b>Figure S16.</b> Excited states for <b>1c</b> . Excited states were characterized for wavelengths $> 350$ nm with oscillator strength ( $f_{osc}$ ) $\geq 0.01$ . Only those hole-particle pairs were considered whose contributions add up to $\geq 70\%$ .....                                                                                                                                                                                                                                                                | 13 |
| <b>Figure S17.</b> Excited states for <b>1e</b> . Excited states were characterized for wavelengths $> 350$ nm with oscillator strength ( $f_{osc}$ ) $\geq 0.01$ . Only those hole-particle pairs were considered whose contributions add up to $\geq 70\%$ . Transitions were classified as metal-centered (MC), metal-to-ligand charge transfer (MLCT), intra-ligand charge transfer (ILCT), intra-ligand charge transfer with some inter-ligand contribution (ILCT’), or ligand-centered (LC) based on visual inspection..... | 17 |
| <b>Figure S18.</b> Excited states for <b>1f</b> . Excited states were characterized for wavelengths $> 350$ nm with oscillator strength ( $f_{osc}$ ) $\geq 0.01$ . Only those hole-particle pairs were considered whose contributions add up to $\geq 70\%$ . Transitions were classified as metal-centered (MC), metal-to-ligand charge transfer (MLCT), intra-ligand charge transfer (ILCT), intra-ligand charge transfer with some inter-ligand contribution (ILCT’), or ligand-centered (LC) based on visual inspection..... | 22 |
| <b>Figure S19.</b> Mixed transition examples for <b>1e</b> . Only the hole-particle pairs whose contributions add up to $\geq 70\%$ were considered in the assignment. Electron density on Fe ( $\rho^{\text{Fe}}$ ) is given in parenthesis. Transitions were classified as metal-centered (MC), metal-to-ligand charge transfer (MLCT), intra-ligand charge transfer (ILCT), intra-ligand charge transfer with some inter-ligand contribution (ILCT’), or ligand-centered (LC) based on visual inspection.....                  | 23 |
| <b>Figure S20.</b> Calculated UV-Vis spectra with TD-DFT employing CAM-B3LYP functional for <b>1a</b> , <b>1c</b> , <b>1e</b> and <b>1f</b> .....                                                                                                                                                                                                                                                                                                                                                                                 | 23 |
| <b>Figure S21.</b> Calculated UV-Vis spectra of <b>1a</b> , <b>1e-L</b> and <b>1e</b> . <b>1e-L</b> denotes a ligand only structure obtained from the optimized geometry of <b>1e</b> .....                                                                                                                                                                                                                                                                                                                                       | 24 |
| <b>Figure S22.</b> Calculated UV-Vis spectra of <b>1a</b> , <b>1f-L</b> and <b>1f</b> . <b>1f-L</b> denotes a ligand only structure obtained from the optimized geometry of <b>1f</b> .....                                                                                                                                                                                                                                                                                                                                       | 25 |

|                                                                                                                                                                                                                                                                                                                                                                                                                                                                                                                                    |    |
|------------------------------------------------------------------------------------------------------------------------------------------------------------------------------------------------------------------------------------------------------------------------------------------------------------------------------------------------------------------------------------------------------------------------------------------------------------------------------------------------------------------------------------|----|
| <b>Figure S23.</b> Electronic properties of <b>1c</b> series of complexes. Top: HOMO and LUMO energies. Bottom: HOMO-LUMO gaps (red) and average % of electron density on the carboxylic acid in doubly degenerate LUMO (blue).....                                                                                                                                                                                                                                                                                                | 25 |
| <b>Figure S24.</b> Calculated UV-Vis spectra with TD-DFT employing CAM-B3LYP functional for <b>1a</b> , <b>1h</b> , <b>1c</b> and <b>1c''''</b> . .....                                                                                                                                                                                                                                                                                                                                                                            | 26 |
| <b>Figure S25.</b> Excited states for <b>1h</b> . Excited states were characterized for wavelengths > 350 nm with oscillator strength ( $f_{osc}$ ) $\geq$ 0.01. Only those hole-particle pairs were considered whose contributions add up to $\geq$ 70 %.....                                                                                                                                                                                                                                                                     | 26 |
| <b>Figure S26.</b> Excited states for <b>1c''''</b> . Excited states were characterized for wavelengths > 350 nm with oscillator strength ( $f_{osc}$ ) $\geq$ 0.01. Only those hole-particle pairs were considered whose contributions add up to $\geq$ 70 %. Transitions were classified as metal-centered (MC), metal-to-ligand charge transfer (MLCT), intra-ligand charge transfer (ILCT), intra-ligand charge transfer with some inter-ligand contribution (ILCT'), or ligand-centered (LC) based on visual inspection. .... | 31 |
| <b>Figure S27.</b> Calculated UV-Vis spectra employing TD-DFT for <b>1a</b> , <b>1h</b> , <b>1f</b> and <b>1f'</b> . Oscillator strength of the transitions are in the bottom plots.....                                                                                                                                                                                                                                                                                                                                           | 32 |
| <b>Figure S28.</b> Electron density on Fe ( $\rho^{Fe}$ ) for the 21 highest energy occupied orbitals near the frontier region for <b>1a</b> , <b>1h</b> , <b>1f</b> , <b>1f'</b> . The KS orbitals with electron distribution $\geq$ 20% are shown in red and among these the doubly degenerate orbitals are labeled with *.....                                                                                                                                                                                                  | 32 |
| <b>Figure S29.</b> Calculated UV-Vis spectra, with CAM-B3LYP functional, of $[Fe(CNC)_2]^{2+}$ and complex with conjugated thiophene substituent on 4' position CNC. ....                                                                                                                                                                                                                                                                                                                                                          | 33 |
| <b>Figure S30.</b> Electron density on Fe ( $\rho^{Fe}$ ) of the 21 higher energy occupied orbitals near the frontier region for $[Fe(CNC)_2]^{2+}$ and the complex with conjugated thiophene substituent on 4' position of CNC. The KS orbitals with electron distribution $\geq$ 20% are shown in red and among these the doubly degenerate orbitals are labeled as '*'. The red '*' indicates energy levels with difference in energy by 0.01 eV.....                                                                           | 33 |

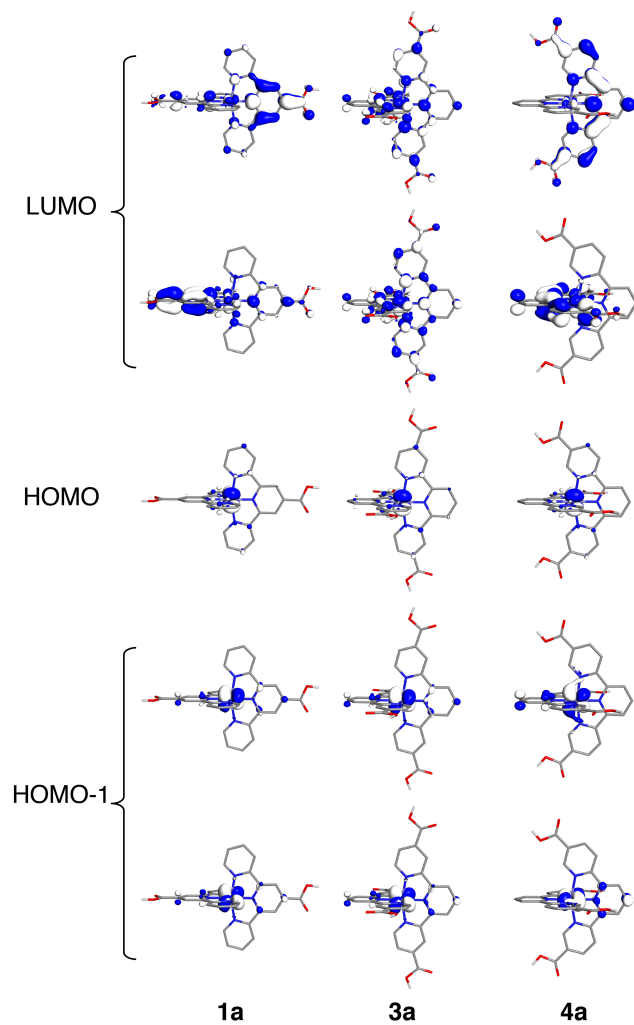

**Figure S1.** Frontier KS orbitals of  $[\text{Fe}(\text{tpy})_2]^{2+}$  complexes substituted by carboxylic acid groups at the 4' (**1a**), 4,4'' (**3a**), and 5,5'' (**4a**) positions.

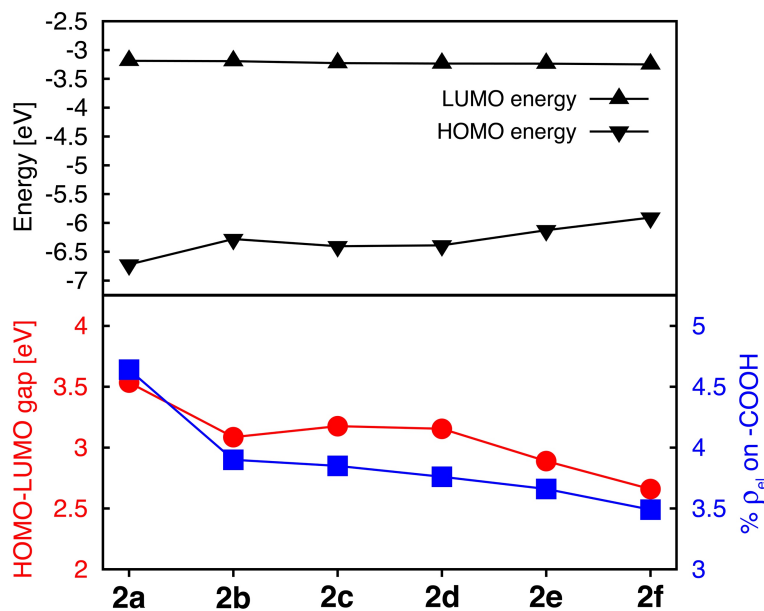

**Figure S2.** Top: HOMO and LUMO energies, bottom: HOMO-LUMO gaps (red), and average % of electron density ( $\rho_{el}$ ) on the linker group in doubly degenerate LUMO (blue) for **2a-f** series of complexes.

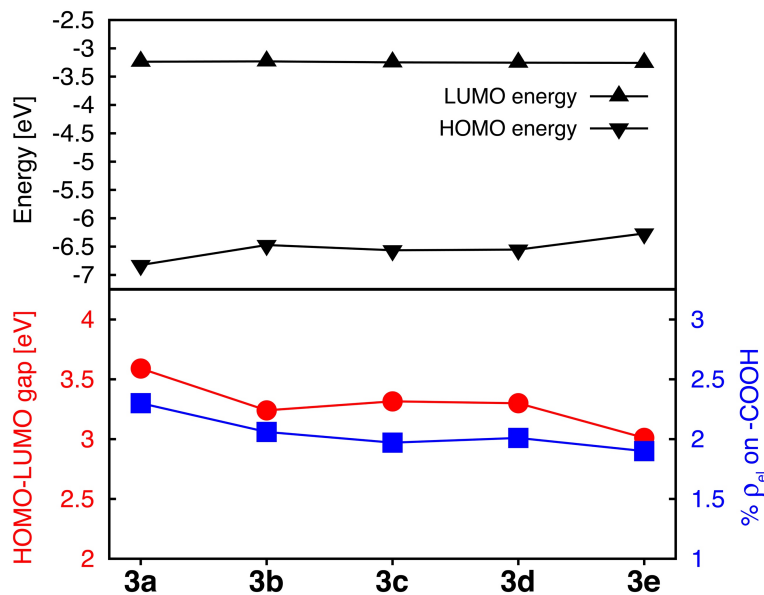

**Figure S3.** Top: HOMO and LUMO energies, bottom: HOMO-LUMO gaps (red), and average % of electron density ( $\rho_{el}$ ) on the linker group in doubly degenerate LUMO (blue) for **3a-e** series of complexes.

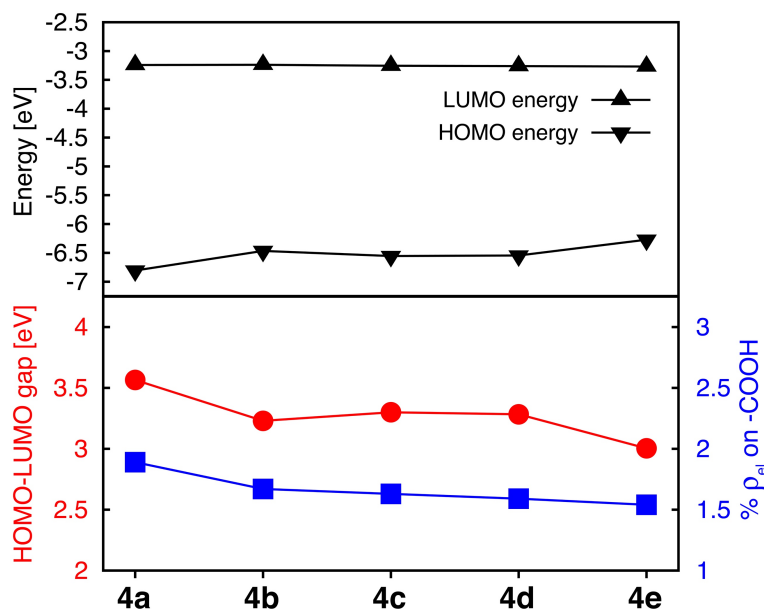

**Figure S4.** Top: HOMO and LUMO energies, bottom: HOMO-LUMO gaps (red), and average % of electron density ( $\rho_{el}$ ) on the linker group in doubly degenerate LUMO (blue) for **4a-e** series of complexes.

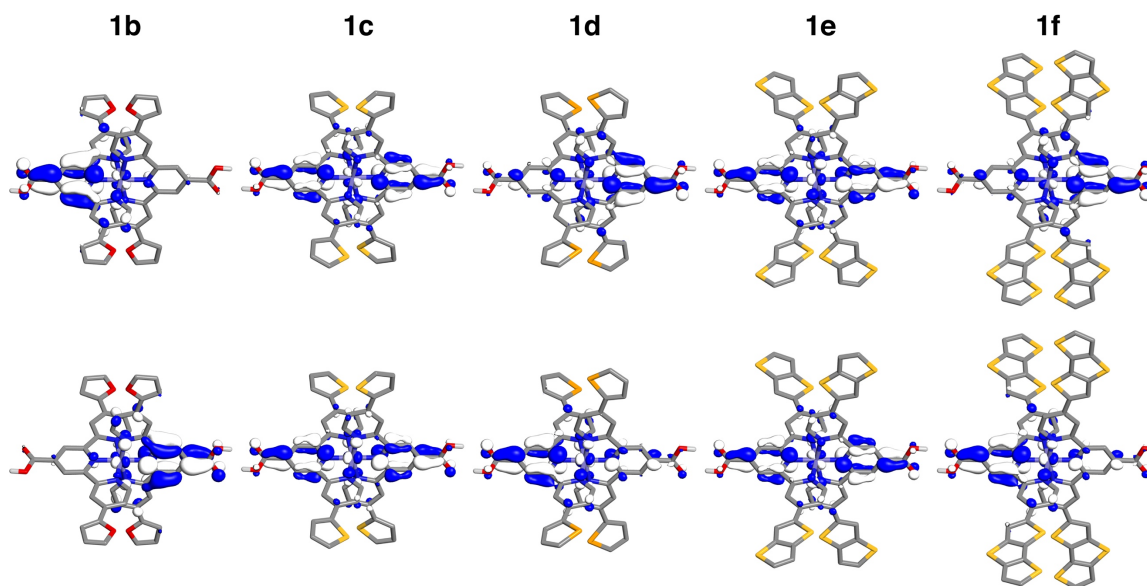

**Figure S5.** Degenerate LUMO orbitals for **1b-f** with carboxylic acid (A) on the center pyridines and donor groups on the side pyridines. Surfaces are constructed with 0.04 isovalue.

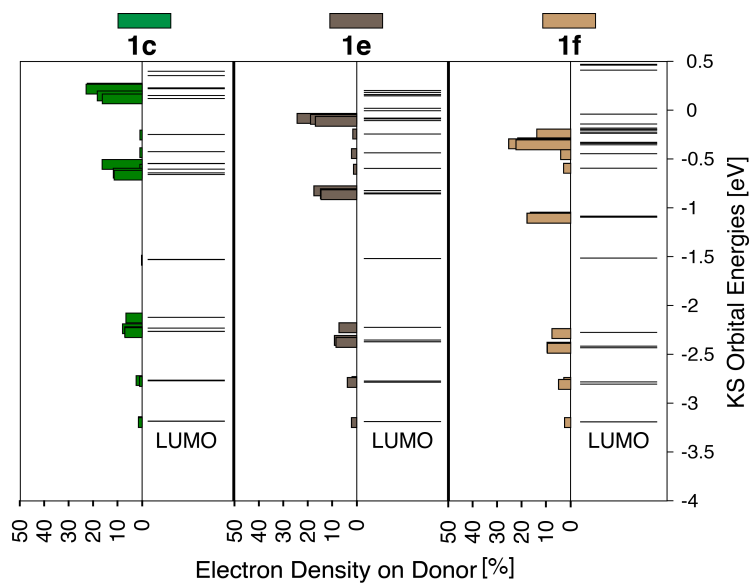

**Figure S6.** Average percent of electron density on a single donor group for the 21 lowest energy unoccupied orbitals near the frontier region for the **1c**, **1e**, and **1f**. Note that average density equal to 25% means that the MO is fully localized on the donor groups.

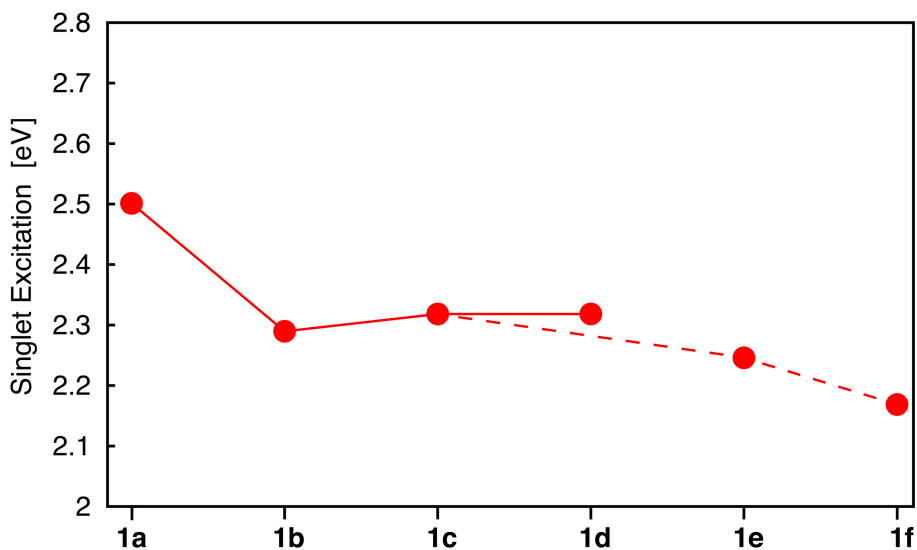

**Figure S7.** First singlet excitation of **1a-f** obtained from the TD-DFT that has contribution mostly from the HOMO to LUMO transition.

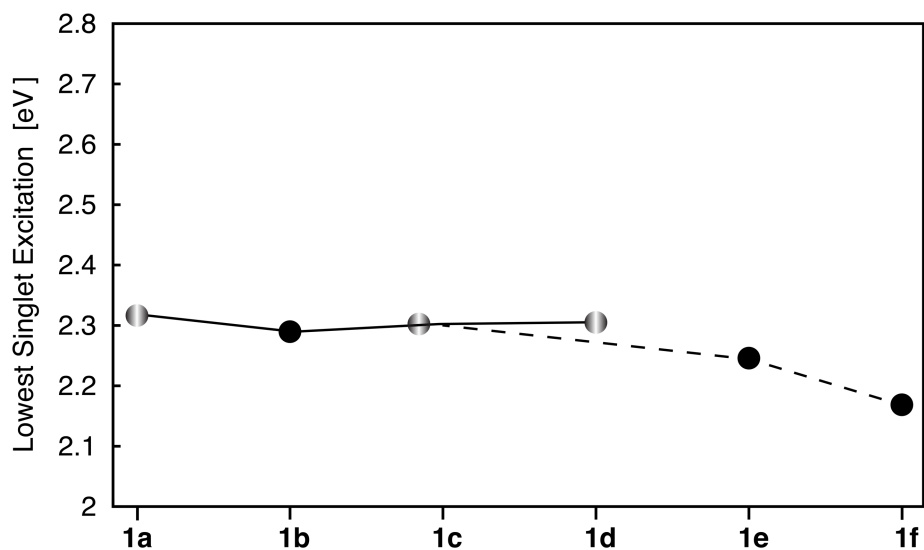

**Figure S8.** Lowest energy singlet excitations of **1a-f** obtained from TD-DFT. The shaded plots indicate transitions from HOMO into an e<sub>g</sub><sup>\*</sup> orbital.

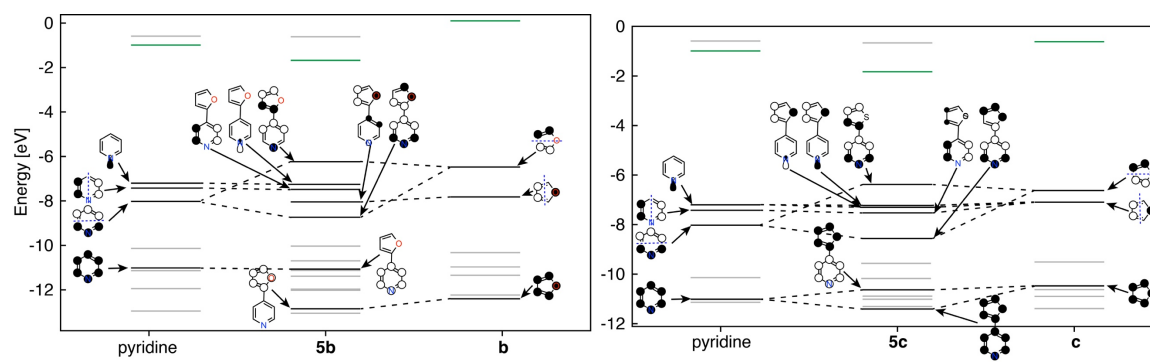

**Figure S9.** Left: the KS orbital diagram of pyridine, **5b** and **b**. Right: the KS orbital diagram of the pyridine, **5c** and **c**. Interactions between the orbitals are shown with dashed lines. LUMO orbitals are marked in green.



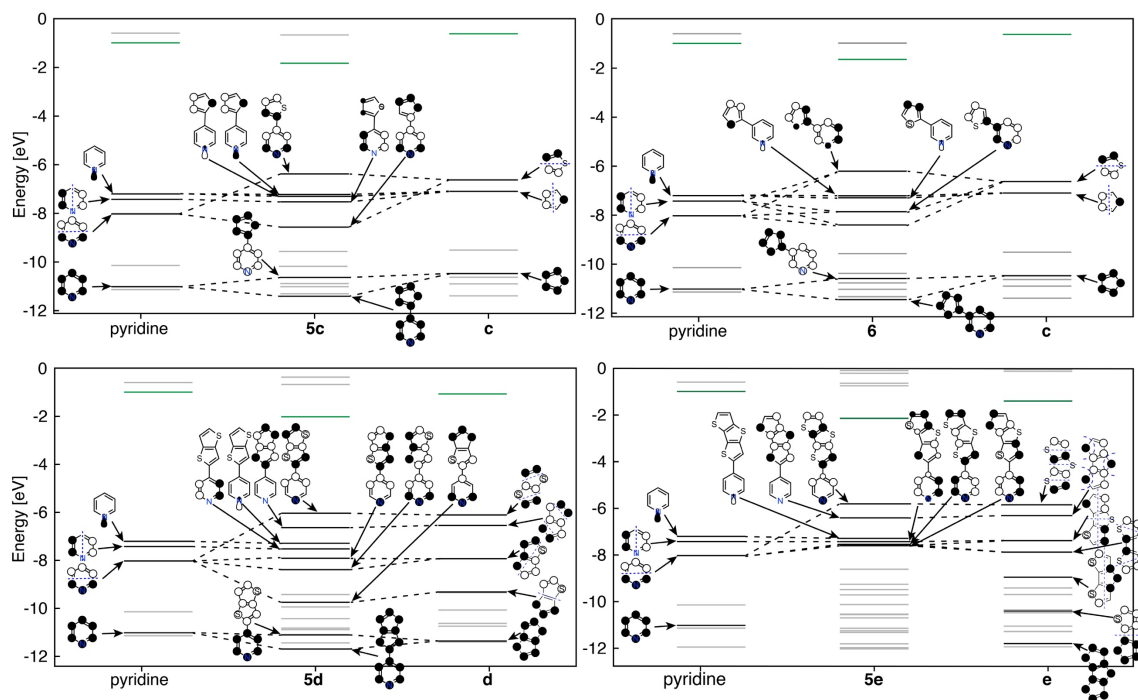

**Figure S10.** The KS orbital diagrams of **5c**, **6**, **5d** and **5e** derived from the interaction of pyridine with their respective donor groups. The relevant orbitals are highlighted. Interactions between the orbitals are shown with dashed lines. LUMO orbitals are marked in green.

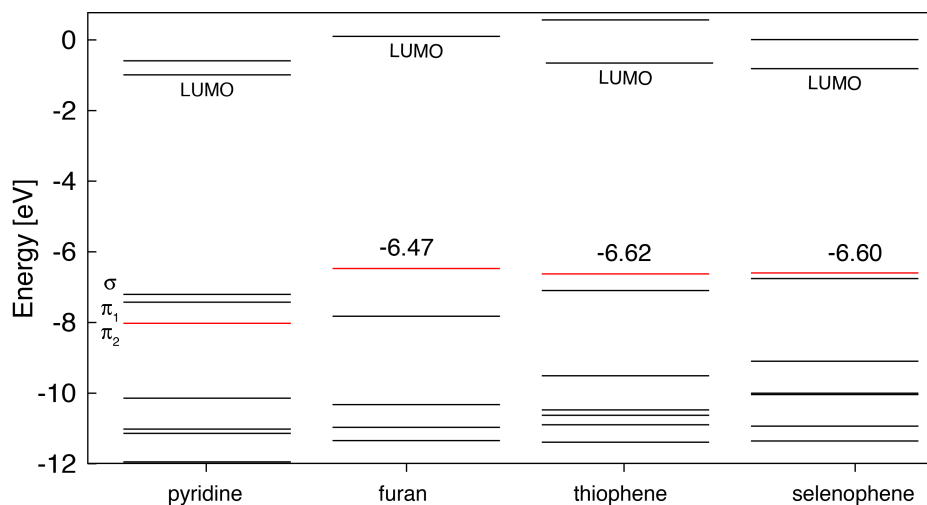

**Figure S11.** The KS energy levels of pyridine and the donor groups (furan, thiophene, selenophene). The red lines are the orbitals that are interacting when the donor group is attached to the pyridine at its 4 position.

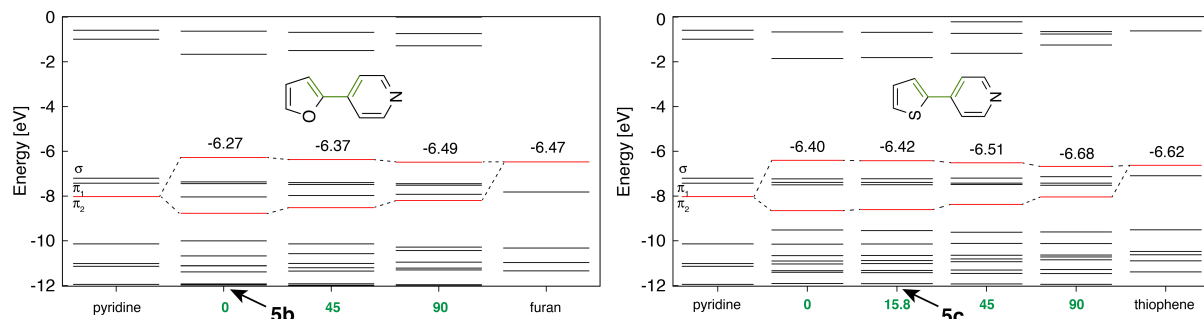

**Figure S12.** The effect of the change in the dihedral (marked in green) on the energy levels of **5b** (left) and **5c** (right). The red lines are the KS orbitals involved in interaction.

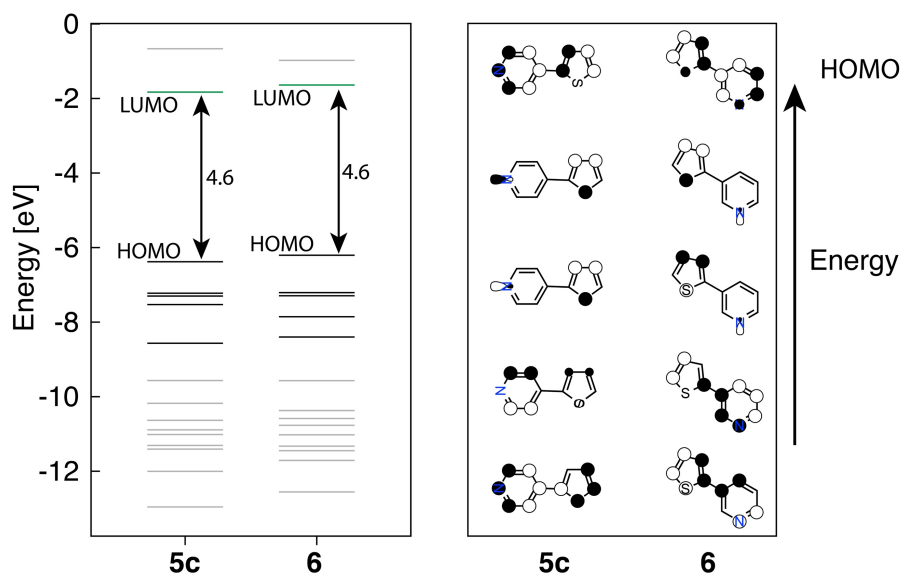

**Figure S13.** Left: the KS orbital energies of **5c** and **6**. Right: schematics of KS orbitals for the energy levels highlighted on the left in the order of increasing energy.

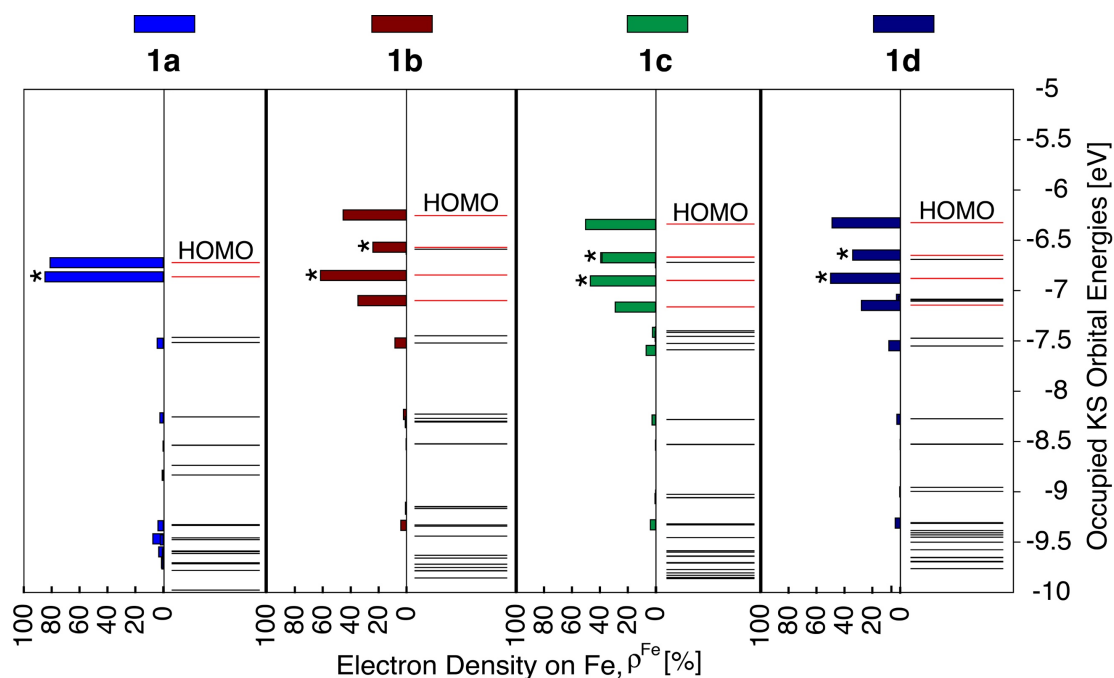

**Figure S14.** Electron density on Fe ( $\rho^{\text{Fe}}$ ) of the 21 higher energy occupied orbitals near the frontier region for the **1a-d**. The KS orbitals with electron distribution  $\geq 20\%$  are shown in red and among these the doubly degenerate orbitals are labeled as ‘\*’.

| Excited state                                       | Hole state | Contribution | Particle state | Characteristic |
|-----------------------------------------------------|------------|--------------|----------------|----------------|
| $\lambda = 442.03 \text{ nm}$<br>$f_{osc} = 0.1698$ |            | → 47.16%     |                | MLCT           |
|                                                     |            | → 47.16%     |                |                |
| $\lambda = 389.65 \text{ nm}$<br>$f_{osc} = 0.0102$ |            | → 84.7%      |                | MLCT           |
|                                                     |            | → 84.7%      |                |                |
| $\lambda = 386.67 \text{ nm}$<br>$f_{osc} = 0.0598$ |            | → 97.4%      |                | MLCT           |

**Figure S15.** Excited states for **1a**. Excited states were characterized for wavelengths  $> 350 \text{ nm}$  with oscillator strength ( $f_{osc}$ )  $\geq 0.01$ . Only those hole-particle pairs were considered whose contributions add up to  $\geq 70\%$ .

| Excited state                                         | Hole state | Contribution | Particle state | Characteristic |
|-------------------------------------------------------|------------|--------------|----------------|----------------|
| $\lambda = 534.84 \text{ nm}$<br>$f_{osc} = 0.0439$   |            | 83.71%       |                | MLCT, ILCT     |
| $\lambda = 534.41 \text{ nm}$<br>$f_{osc} = 0.0421$   |            | 83.98%       |                | MLCT, ILCT     |
| $\lambda = 456.57 \text{ nm}^a$<br>$f_{osc} = 0.0271$ |            | 17.48%       |                | MC             |
|                                                       |            | 14.89%       |                |                |
|                                                       |            | 14.36%       |                |                |
|                                                       |            | 14.18%       |                |                |
| $\lambda = 456.32 \text{ nm}$<br>$f_{osc} = 0.1622$   |            | 29.89%       |                | MLCT, ILCT     |
|                                                       |            | 28.86%       |                |                |
|                                                       |            | 11.21%       |                |                |
|                                                       |            | 11.17%       |                |                |
| $\lambda = 422.19 \text{ nm}$<br>$f_{osc} = 0.058$    |            | 94.79%       |                | MLCT, ILCT     |
| $\lambda = 403.95 \text{ nm}$<br>$f_{osc} = 0.0568$   |            | 57.45%       |                | MLCT, ILCT     |
|                                                       |            | 28.47%       |                |                |

<sup>a</sup> Excitation with closely contributing hole-particle pairs hence only those with  $\geq 10\%$  contribution were considered for characterization.

|                                                     |                                                                                      |            |
|-----------------------------------------------------|--------------------------------------------------------------------------------------|------------|
| $\lambda = 403.43 \text{ nm}$<br>$f_{osc} = 0.0572$ | 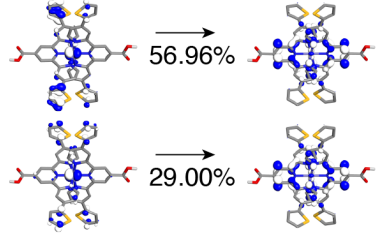   | MLCT, ILCT |
| $\lambda = 396.68 \text{ nm}$<br>$f_{osc} = 0.1158$ |    | ILCT       |
| $\lambda = 396.42 \text{ nm}$<br>$f_{osc} = 0.1188$ |    | ILCT       |
| $\lambda = 386.60 \text{ nm}$<br>$f_{osc} = 0.0192$ |    | MLCT, ILCT |
| $\lambda = 386.29 \text{ nm}$<br>$f_{osc} = 0.0183$ |   | MLCT, ILCT |
| $\lambda = 365.34 \text{ nm}$<br>$f_{osc} = 0.1791$ |  | MLCT, ILCT |
| $\lambda = 365.20 \text{ nm}$<br>$f_{osc} = 0.1700$ |  | MLCT, ILCT |
| $\lambda = 352.01 \text{ nm}$<br>$f_{osc} = 0.2934$ |  | MLCT, ILCT |
| $\lambda = 351.86 \text{ nm}$<br>$f_{osc} = 0.2866$ |  | MLCT, ILCT |

**Figure S16.** Excited states for **1c**. Excited states were characterized for wavelengths  $> 350 \text{ nm}$  with oscillator strength ( $f_{osc}$ )  $\geq 0.01$ . Only those hole-particle pairs were considered whose contributions add up to  $\geq 70 \%$ .

|                                                     |                                                                                     |            |
|-----------------------------------------------------|-------------------------------------------------------------------------------------|------------|
| $\lambda = 552.13 \text{ nm}$<br>$f_{osc} = 0.0973$ | 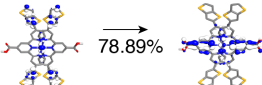   | MLCT, ILCT |
| $\lambda = 552.1 \text{ nm}$<br>$f_{osc} = 0.0972$  |    | MLCT, ILCT |
| $\lambda = 473.12 \text{ nm}$<br>$f_{osc} = 0.2283$ |    | MLCT, ILCT |
|                                                     |    |            |
|                                                     |    |            |
| $\lambda = 451.9 \text{ nm}$<br>$f_{osc} = 0.2086$  |    | ILCT       |
| $\lambda = 451.89 \text{ nm}$<br>$f_{osc} = 0.2088$ |    | ILCT       |
| $\lambda = 440.67 \text{ nm}$<br>$f_{osc} = 0.0394$ |   | MLCT, ILCT |
| $\lambda = 427.1 \text{ nm}$<br>$f_{osc} = 0.0397$  |  | MLCT, ILCT |
|                                                     |  |            |
|                                                     |  |            |
|                                                     |  |            |
| $\lambda = 413.14 \text{ nm}$<br>$f_{osc} = 0.0924$ |  | MLCT, ILCT |
|                                                     |  |            |
| $\lambda = 413.12 \text{ nm}$<br>$f_{osc} = 0.0922$ |  | MLCT, ILCT |
|                                                     |  |            |

|                                                     |  |            |
|-----------------------------------------------------|--|------------|
| $\lambda = 411.08 \text{ nm}$<br>$f_{osc} = 0.2075$ |  | MLCT, ILCT |
| $\lambda = 411.07 \text{ nm}$<br>$f_{osc} = 0.2074$ |  | MLCT, ILCT |
| $\lambda = 399.84 \text{ nm}$<br>$f_{osc} = 0.0352$ |  | MLCT, ILCT |
| $\lambda = 399.83 \text{ nm}$<br>$f_{osc} = 0.0353$ |  | MLCT, ILCT |
| $\lambda = 393.11 \text{ nm}$<br>$f_{osc} = 0.0253$ |  | ILCT       |
| $\lambda = 383.35 \text{ nm}$<br>$f_{osc} = 0.0288$ |  | ILCT       |
| $\lambda = 383.35 \text{ nm}$<br>$f_{osc} = 0.029$  |  | ILCT       |

|                                                       |                                                                                                                                                                                                                                                                   |                 |
|-------------------------------------------------------|-------------------------------------------------------------------------------------------------------------------------------------------------------------------------------------------------------------------------------------------------------------------|-----------------|
| $\lambda = 379.61 \text{ nm}^a$<br>$f_{osc} = 0.1974$ | 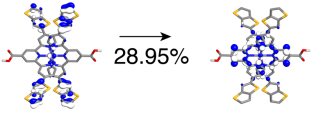<br><br>       | MLCT, ILCT      |
| $\lambda = 379.60 \text{ nm}^a$<br>$f_{osc} = 0.1986$ | <br><br>       | MLCT, ILCT      |
| $\lambda = 376.26 \text{ nm}$<br>$f_{osc} = 0.4392$   |                                                                                                                                                                                 | MLCT, ILCT'     |
| $\lambda = 376.24 \text{ nm}$<br>$f_{osc} = 0.4424$   |                                                                                                                                                                                | MLCT, ILCT      |
| $\lambda = 375.62 \text{ nm}$<br>$f_{osc} = 0.1001$   |                                                                                                                                                                                | MLCT, ILCT      |
| $\lambda = 350.48 \text{ nm}^a$<br>$f_{osc} = 0.787$  | <br><br> | MLCT, ILCT', LC |

<sup>a</sup> Excitation with closely contributing hole-particle pairs hence only those with  $\geq 10\%$  contribution were considered for characterization.



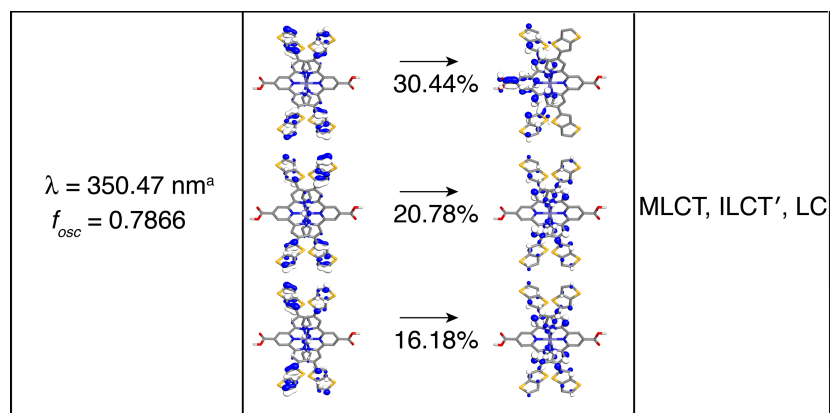

<sup>a</sup> Excitation with closely contributing hole-particle pairs hence only those with  $\geq 10\%$  contribution were considered for characterization.

**Figure S17.** Excited states for **1e**. Excited states were characterized for wavelengths  $> 350 \text{ nm}$  with oscillator strength ( $f_{osc}$ )  $\geq 0.01$ . Only those hole-particle pairs were considered whose contributions add up to  $\geq 70\%$ . Transitions were classified as metal-centered (MC), metal-to-ligand charge transfer (MLCT), intra-ligand charge transfer (ILCT), intra-ligand charge transfer with some inter-ligand contribution (ILCT'), or ligand-centered (LC) based on visual inspection.

|                                                     |                                                                                      |            |
|-----------------------------------------------------|--------------------------------------------------------------------------------------|------------|
| $\lambda = 571.76 \text{ nm}$<br>$f_{osc} = 0.1750$ | 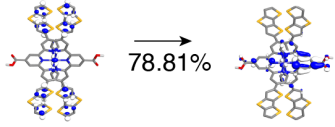   | MLCT, ILCT |
| $\lambda = 571.74 \text{ nm}$<br>$f_{osc} = 0.1748$ |    | MLCT, ILCT |
| $\lambda = 504.34 \text{ nm}$<br>$f_{osc} = 0.1217$ |    | ILCT       |
| $\lambda = 495.08 \text{ nm}$<br>$f_{osc} = 0.2730$ |   | ILCT       |
| $\lambda = 495.08 \text{ nm}$<br>$f_{osc} = 0.2732$ |  | ILCT       |

|                                                      |                                                                                                                                                                              |            |
|------------------------------------------------------|------------------------------------------------------------------------------------------------------------------------------------------------------------------------------|------------|
| $\lambda = 460.00 \text{ nm}$<br>$f_{osc} = 0.0213$  | 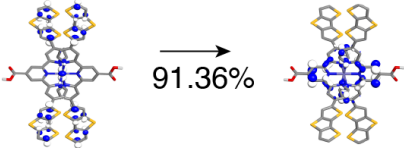                                                                                           | MLCT, ILCT |
| $\lambda = 442.65 \text{ nm}$<br>$f_{osc} = 0.13687$ | <br>     | MLCT       |
| $\lambda = 436.44 \text{ nm}$<br>$f_{osc} = 0.3700$  | <br>    | MLCT, ILCT |
| $\lambda = 436.44 \text{ nm}$<br>$f_{osc} = 0.3702$  | <br> | MLCT, ILCT |
| $\lambda = 432.37 \text{ nm}$<br>$f_{osc} = 0.2186$  | <br> | MLCT, ILCT |

|                                                     |                                                                                      |                 |
|-----------------------------------------------------|--------------------------------------------------------------------------------------|-----------------|
| $\lambda = 432.37 \text{ nm}$<br>$f_{osc} = 0.2179$ | 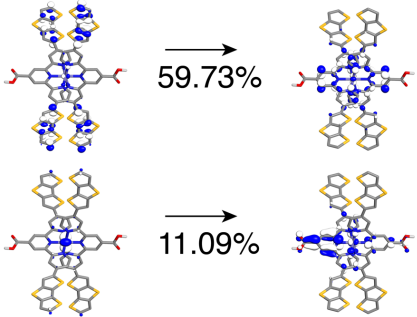   | MLCT, ILCT      |
| $\lambda = 424.95 \text{ nm}$<br>$f_{osc} = 0.0102$ |    | ILCT            |
| $\lambda = 400.08 \text{ nm}$<br>$f_{osc} = 0.8977$ |    | MLCT, ILCT      |
| $\lambda = 400.07 \text{ nm}$<br>$f_{osc} = 0.9039$ |   | MLCT, ILCT', LC |
| $\lambda = 399.65 \text{ nm}$<br>$f_{osc} = 0.0484$ |  | MLCT, ILCT, LC  |
| $\lambda = 380.95 \text{ nm}$<br>$f_{osc} = 0.2250$ |  | MLCT, ILCT, LC  |
| $\lambda = 380.94 \text{ nm}$<br>$f_{osc} = 0.2272$ |  | MLCT, ILCT, LC  |

|                                                                                      |                                                                                                                                                                                                                                                              |                        |
|--------------------------------------------------------------------------------------|--------------------------------------------------------------------------------------------------------------------------------------------------------------------------------------------------------------------------------------------------------------|------------------------|
| <p> <math>\lambda = 378.75 \text{ nm}</math><br/> <math>f_{osc} = 0.3902</math> </p> | 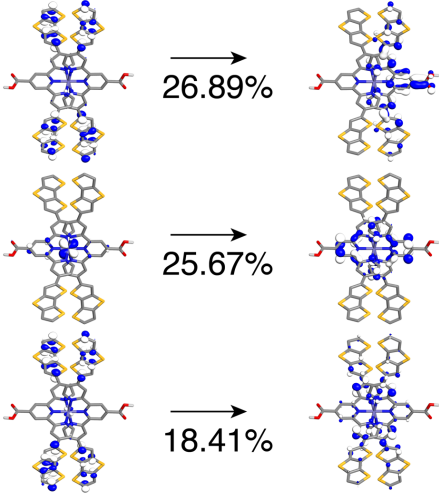 <p> <math>\longrightarrow</math> 26.89%<br/> <math>\longrightarrow</math> 25.67%<br/> <math>\longrightarrow</math> 18.41% </p>                                            | <p>MLCT, ILCT', LC</p> |
| <p> <math>\lambda = 378.75 \text{ nm}</math><br/> <math>f_{osc} = 0.3888</math> </p> |  <p> <math>\longrightarrow</math> 26.78%<br/> <math>\longrightarrow</math> 25.94%<br/> <math>\longrightarrow</math> 18.32% </p>                                           | <p>MLCT, ILCT, LC</p>  |
| <p> <math>\lambda = 376.40 \text{ nm}</math><br/> <math>f_{osc} = 0.0110</math> </p> |  <p> <math>\longrightarrow</math> 24.38%<br/> <math>\longrightarrow</math> 24.27%<br/> <math>\longrightarrow</math> 14.89%<br/> <math>\longrightarrow</math> 14.87% </p> | <p>ILCT', LC</p>       |

|                                                     |                                                                                      |            |
|-----------------------------------------------------|--------------------------------------------------------------------------------------|------------|
| $\lambda = 365.66 \text{ nm}$<br>$f_{osc} = 0.0188$ | 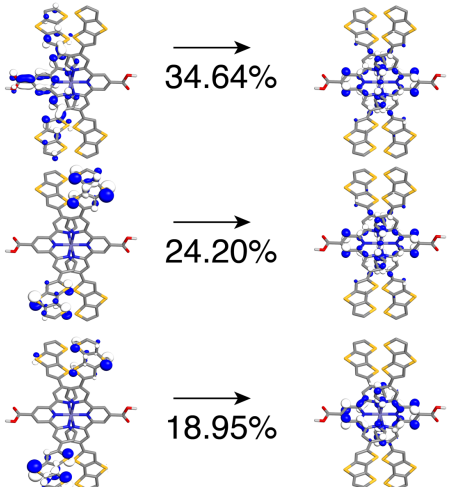   | ILCT', LC  |
| $\lambda = 365.35 \text{ nm}$<br>$f_{osc} = 0.0489$ |   | MLCT, ILCT |
| $\lambda = 359.95 \text{ nm}$<br>$f_{osc} = 0.0888$ |  | ILCT       |
| $\lambda = 359.93 \text{ nm}$<br>$f_{osc} = 0.0915$ |  | ILCT       |

**Figure S18.** Excited states for **1f**. Excited states were characterized for wavelengths  $> 350 \text{ nm}$  with oscillator strength ( $f_{osc}$ )  $\geq 0.01$ . Only those hole-particle pairs were considered whose contributions add up to  $\geq 70 \%$ . Transitions were classified as metal-centered (MC), metal-to-ligand charge transfer (MLCT), intra-ligand charge transfer (ILCT), intra-ligand charge transfer with some inter-ligand contribution (ILCT'), or ligand-centered (LC) based on visual inspection.

| Excited state                               | Hole state $\longrightarrow$ Particle state<br>Contribution                                             | Characteristic |
|---------------------------------------------|---------------------------------------------------------------------------------------------------------|----------------|
| $\lambda = 376.26$ nm<br>$f_{osc} = 0.4392$ | 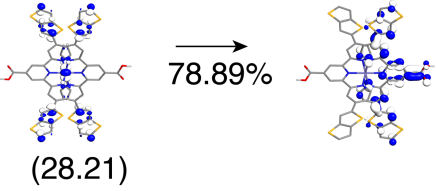<br>(28.21)           | MLCT, ILCT'    |
| $\lambda = 413.12$ nm<br>$f_{osc} = 0.0922$ | <br>(0.02)<br>(61.66) | MLCT, ILCT     |

**Figure S19.** Mixed transition examples for **1e**. Only the hole-particle pairs whose contributions add up to  $\geq 70$  % were considered in the assignment. Electron density on Fe ( $\rho^{Fe}$ ) is given in parenthesis. Transitions were classified as metal-centered (MC), metal-to-ligand charge transfer (MLCT), intra-ligand charge transfer (ILCT), intra-ligand charge transfer with some inter-ligand contribution (ILCT'), or ligand-centered (LC) based on visual inspection.

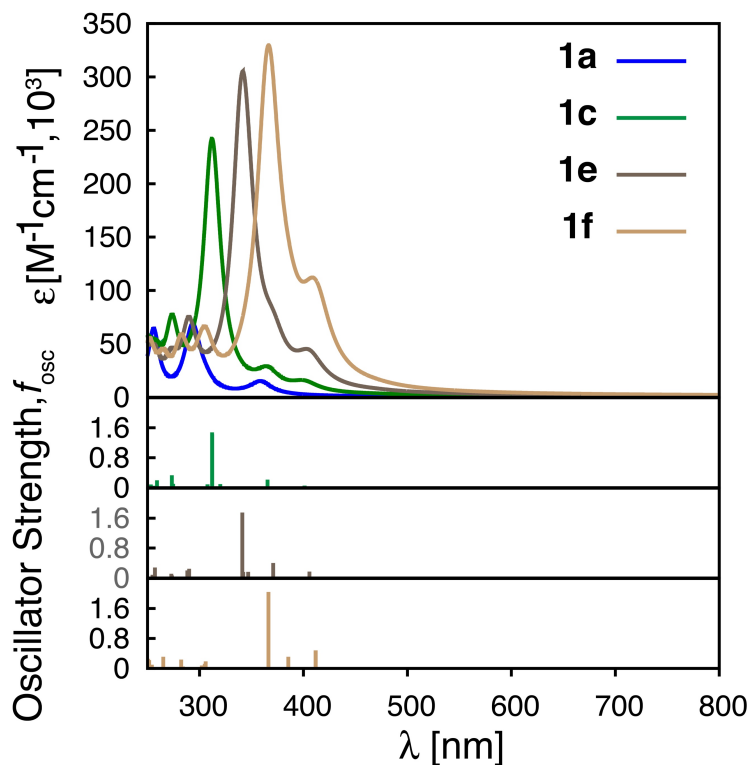

**Figure S20.** Calculated UV-Vis spectra with TD-DFT employing CAM-B3LYP functional for **1a**, **1c**, **1e** and **1f**.

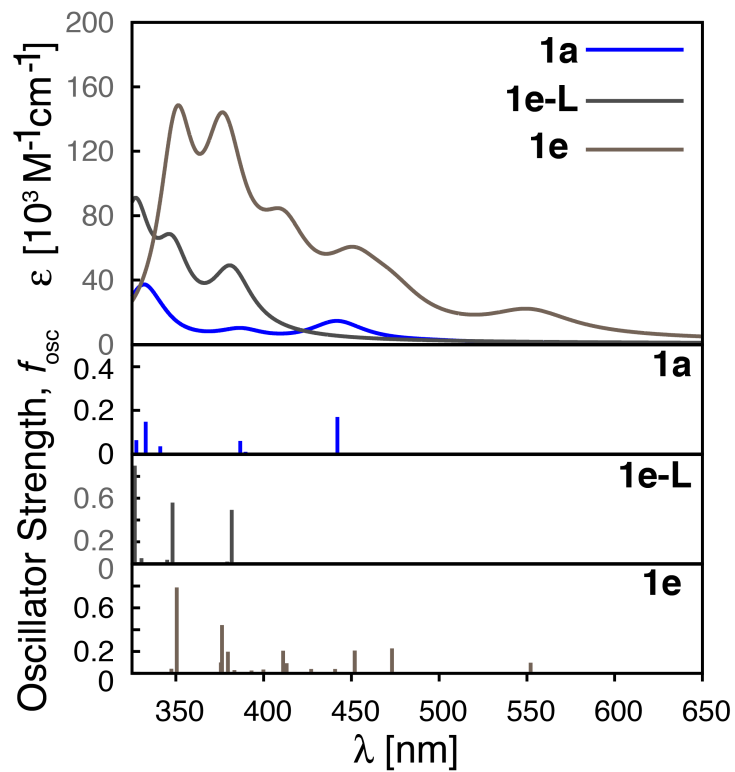

**Figure S21.** Calculated UV-Vis spectra of **1a**, **1e-L** and **1e**. **1e-L** denotes a ligand only structure obtained from the optimized geometry of **1e**.



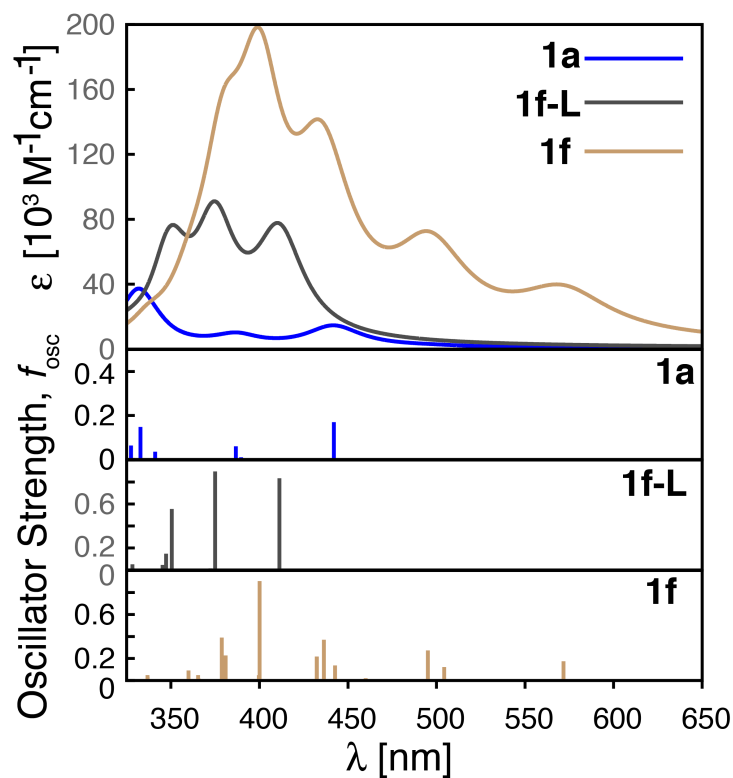

**Figure S22.** Calculated UV-Vis spectra of **1a**, **1f-L** and **1f**. **1f-L** denotes a ligand only structure obtained from the optimized geometry of **1f**.

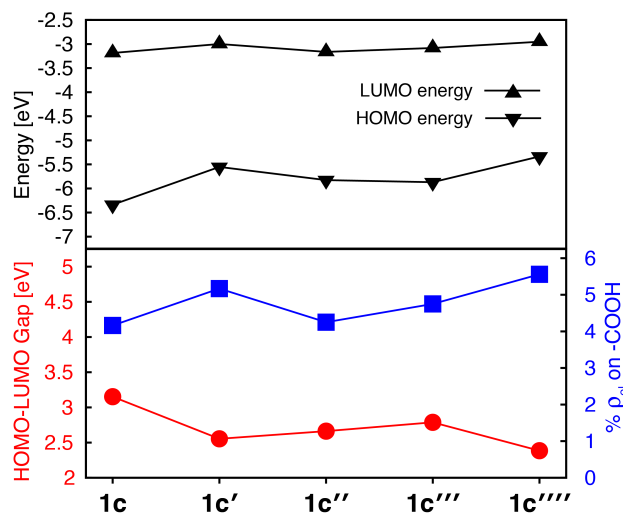

**Figure S23.** Electronic properties of **1c** series of complexes. Top: HOMO and LUMO energies. Bottom: HOMO-LUMO gaps (red) and average % of electron density on the carboxylic acid in doubly degenerate LUMO (blue).

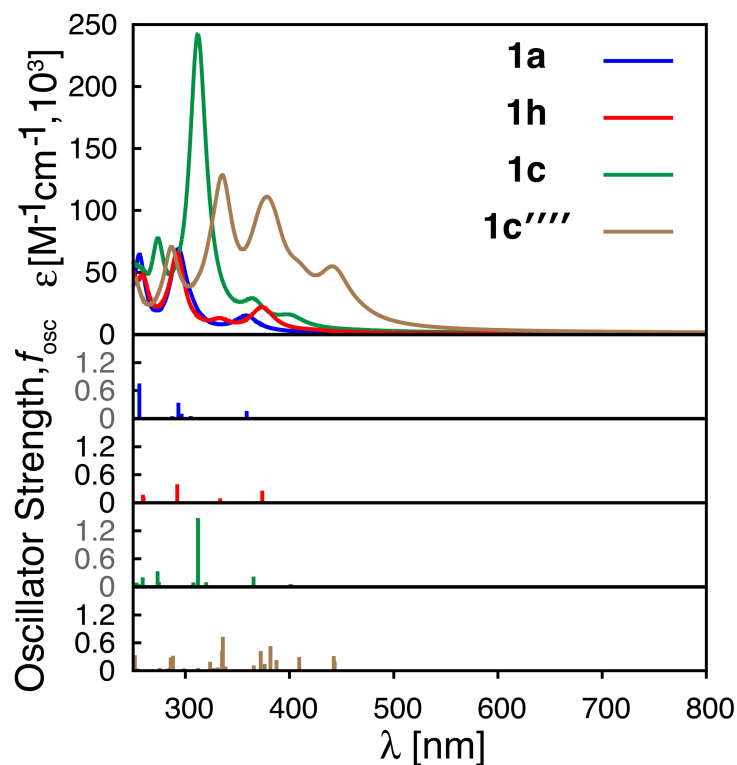

**Figure S24.** Calculated UV-Vis spectra with TD-DFT employing CAM-B3LYP functional for **1a**, **1h**, **1c** and **1c''''**.

| Excited state                               | Hole state | Contribution               | Particle state | Characteristic |
|---------------------------------------------|------------|----------------------------|----------------|----------------|
| $\lambda = 468.82$ nm<br>$f_{osc} = 0.1699$ |            | $\longrightarrow$<br>40.0% |                | MLCT           |
|                                             |            | $\longrightarrow$<br>39.9% |                |                |
| $\lambda = 448.83$ nm<br>$f_{osc} = 0.1328$ |            | $\longrightarrow$<br>85.8% |                | MLCT           |
| $\lambda = 401.62$ nm<br>$f_{osc} = 0.0124$ |            | $\longrightarrow$<br>73.4% |                | MLCT           |
| $\lambda = 401.60$ nm<br>$f_{osc} = 0.0123$ |            | $\longrightarrow$<br>73.6% |                | MLCT           |
| $\lambda = 380.36$ nm<br>$f_{osc} = 0.0128$ |            | $\longrightarrow$<br>98.9% |                | LC             |
| $\lambda = 380.34$ nm<br>$f_{osc} = 0.0129$ |            | $\longrightarrow$<br>98.9% |                | LC             |

**Figure S25.** Excited states for **1h**. Excited states were characterized for wavelengths > 350 nm with oscillator strength ( $f_{osc}$ )  $\geq 0.01$ . Only those hole-particle pairs were considered whose contributions add up to  $\geq 70$  %.

|                                                     |                                                                                      |             |
|-----------------------------------------------------|--------------------------------------------------------------------------------------|-------------|
| $\lambda = 671.96 \text{ nm}$<br>$f_{osc} = 0.056$  | 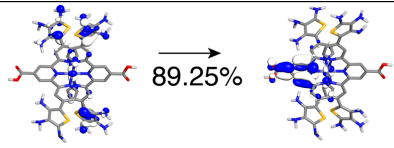   | MLCT, ILCT' |
| $\lambda = 660.9 \text{ nm}$<br>$f_{osc} = 0.1065$  |    | MLCT, ILCT' |
| $\lambda = 598.63 \text{ nm}$<br>$f_{osc} = 0.0735$ |    | ILCT        |
| $\lambda = 588.69 \text{ nm}$<br>$f_{osc} = 0.0593$ |    | ILCT'       |
| $\lambda = 583.73 \text{ nm}$<br>$f_{osc} = 0.0318$ |    | ILCT        |
| $\lambda = 541.61 \text{ nm}$<br>$f_{osc} = 0.0708$ |   | ILCT        |
| $\lambda = 534.13 \text{ nm}$<br>$f_{osc} = 0.0168$ |  | MLCT, ILCT  |
| $\lambda = 533.78 \text{ nm}$<br>$f_{osc} = 0.016$  |  | ILCT'       |
| $\lambda = 502.91 \text{ nm}$<br>$f_{osc} = 0.0184$ |  | ILCT        |
| $\lambda = 497.89 \text{ nm}$<br>$f_{osc} = 0.0301$ |  | ILCT'       |
| $\lambda = 486.95 \text{ nm}$<br>$f_{osc} = 0.0239$ |  | ILCT        |

|                                                       |  |             |
|-------------------------------------------------------|--|-------------|
| $\lambda = 486.05 \text{ nm}$<br>$f_{osc} = 0.0546$   |  | ILCT'       |
| $\lambda = 462.81 \text{ nm}^a$<br>$f_{osc} = 0.0567$ |  | MLCT, ILCT  |
| $\lambda = 453.65 \text{ nm}$<br>$f_{osc} = 0.1654$   |  | MLCT        |
| $\lambda = 449.24 \text{ nm}^a$<br>$f_{osc} = 0.0329$ |  | MLCT, MC    |
| $\lambda = 444.95 \text{ nm}$<br>$f_{osc} = 0.0292$   |  | ILCT'       |
| $\lambda = 443.84 \text{ nm}^a$<br>$f_{osc} = 0.0121$ |  | MLCT        |
| $\lambda = 406.15 \text{ nm}$<br>$f_{osc} = 0.014$    |  | ILCT        |
| $\lambda = 405.38 \text{ nm}$<br>$f_{osc} = 0.0448$   |  | MLCT, ILCT' |

<sup>a</sup> Excitation with closely contributing hole-particle pairs hence only those with  $\geq 10\%$  contribution were considered for characterization.

|                                                     |                                                                                      |             |
|-----------------------------------------------------|--------------------------------------------------------------------------------------|-------------|
| $\lambda = 404.22 \text{ nm}$<br>$f_{osc} = 0.0645$ | 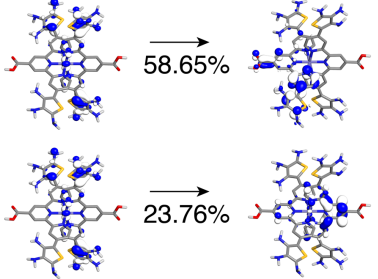   | MLCT, ILCT' |
| $\lambda = 396.86 \text{ nm}$<br>$f_{osc} = 0.0645$ |    | MLCT        |
| $\lambda = 396.26 \text{ nm}$<br>$f_{osc} = 0.0614$ |   | MLCT        |
| $\lambda = 392.13 \text{ nm}$<br>$f_{osc} = 0.7069$ |  | MLCT, ILCT  |
| $\lambda = 387.8 \text{ nm}$<br>$f_{osc} = 0.0275$  |  | MLCT        |

|                                                       |                                                                                      |            |
|-------------------------------------------------------|--------------------------------------------------------------------------------------|------------|
| $\lambda = 386.04 \text{ nm}$<br>$f_{osc} = 0.2453$   | 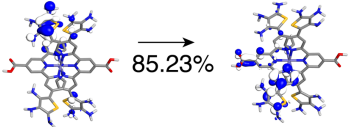   | ILCT       |
| $\lambda = 383.41 \text{ nm}^a$<br>$f_{osc} = 0.0896$ |    | MLCT, ILCT |
| $\lambda = 375.88 \text{ nm}^a$<br>$f_{osc} = 0.0363$ |    | MLCT       |
| $\lambda = 374.94 \text{ nm}$<br>$f_{osc} = 0.3069$   |    | ILCT'      |
| $\lambda = 371.65 \text{ nm}^a$<br>$f_{osc} = 0.2352$ |   | ILCT       |
| $\lambda = 369.19 \text{ nm}^a$<br>$f_{osc} = 0.579$  |  | ILCT       |
| $\lambda = 368.73 \text{ nm}$<br>$f_{osc} = 0.0211$   |  | ILCT'      |
| $\lambda = 363.37 \text{ nm}$<br>$f_{osc} = 0.1948$   |  | ILCT'      |

<sup>a</sup> Excitation with closely contributing hole-particle pairs hence only those with  $\geq 10\%$  contribution were considered for characterization.

|                                                     |  |             |
|-----------------------------------------------------|--|-------------|
| $\lambda = 363.22 \text{ nm}$<br>$f_{osc} = 0.0414$ |  | MLCT, ILCT' |
| $\lambda = 361.36 \text{ nm}$<br>$f_{osc} = 0.2733$ |  | MLCT, ILCT' |
| $\lambda = 355.89 \text{ nm}$<br>$f_{osc} = 0.0287$ |  | ILCT'       |
| $\lambda = 354.18 \text{ nm}$<br>$f_{osc} = 0.0599$ |  | MLCT, ILCT  |

**Figure S26.** Excited states for **1c'''**. Excited states were characterized for wavelengths  $> 350 \text{ nm}$  with oscillator strength ( $f_{osc}$ )  $\geq 0.01$ . Only those hole-particle pairs were considered whose contributions add up to  $\geq 70 \%$ . Transitions were classified as metal-centered (MC), metal-to-ligand charge transfer (MLCT), intra-ligand charge transfer (ILCT), intra-ligand charge transfer with some inter-ligand contribution (ILCT'), or ligand-centered (LC) based on visual inspection.

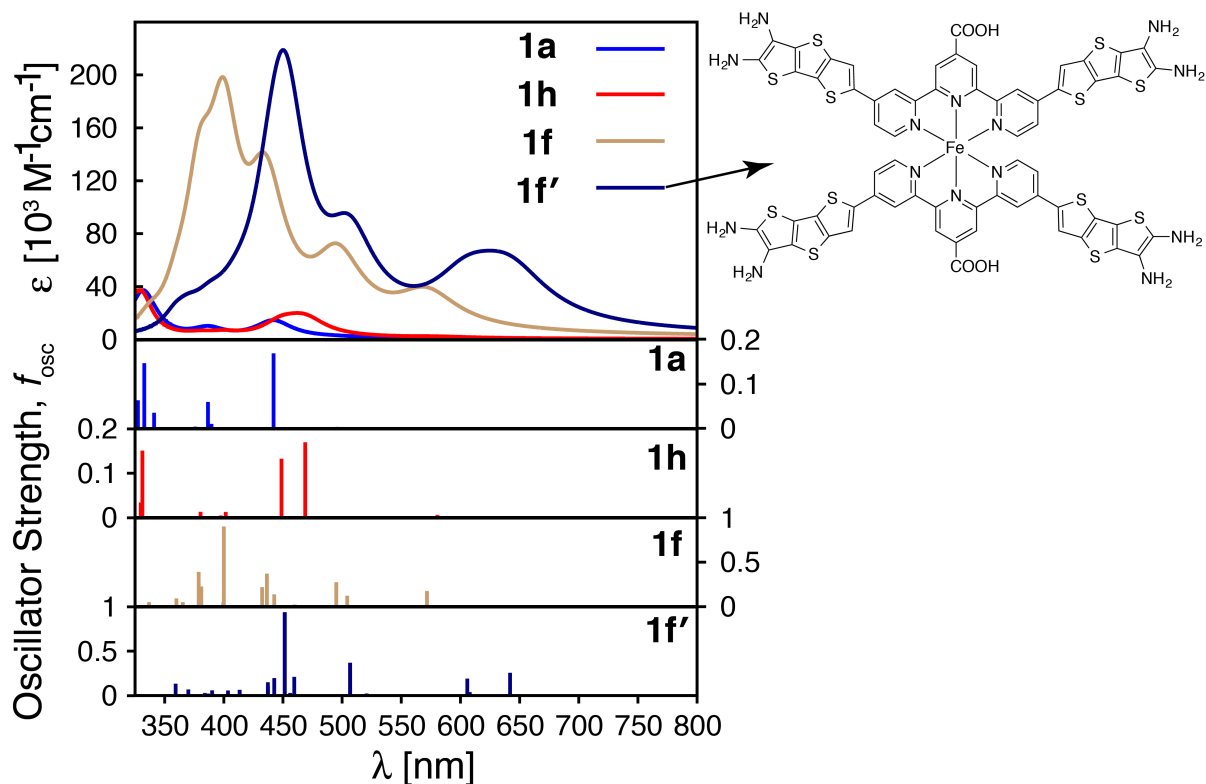

**Figure S27.** Calculated UV-Vis spectra employing TD-DFT for **1a**, **1h**, **1f** and **1f'**. Oscillator strength of the transitions are in the bottom plots.

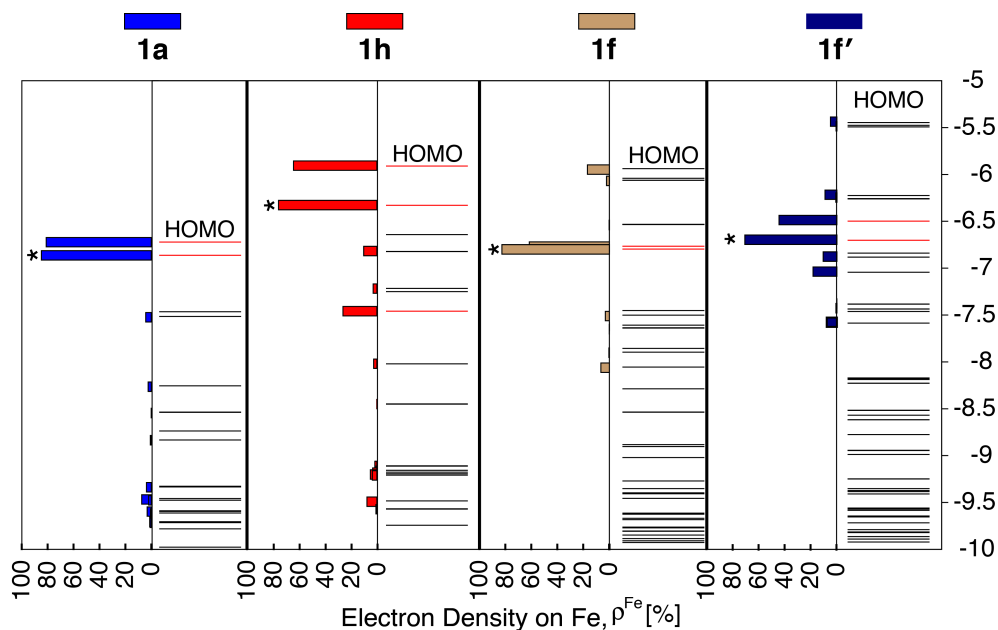

**Figure S28.** Electron density on Fe ( $\rho^{\text{Fe}}$ ) for the 21 highest energy occupied orbitals near the frontier region for **1a**, **1h**, **1f**, **1f'**. The KS orbitals with electron distribution  $\geq 20\%$  are shown in red and among these the doubly degenerate orbitals are labeled with \*.



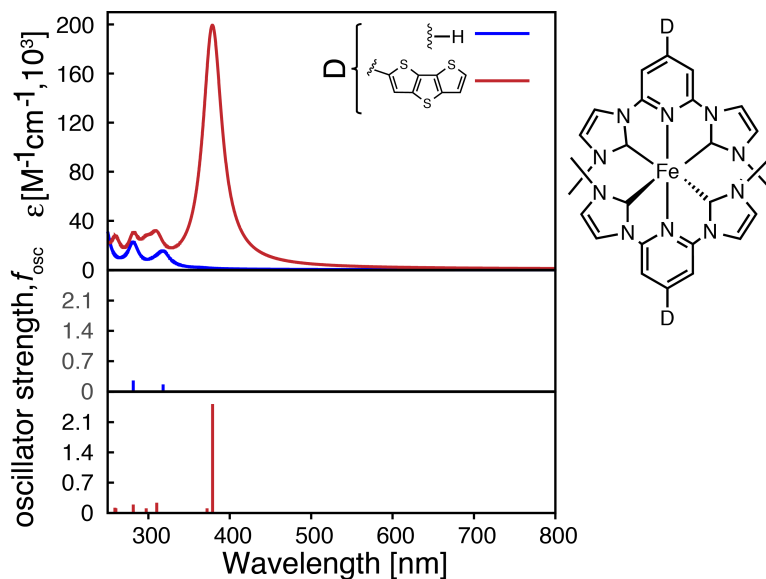

**Figure S29.** Calculated UV-Vis spectra, with CAM-B3LYP functional, of  $[\text{Fe}(\text{CNC})_2]^{2+}$  and complex with conjugated thiophene substituent on 4' position CNC.

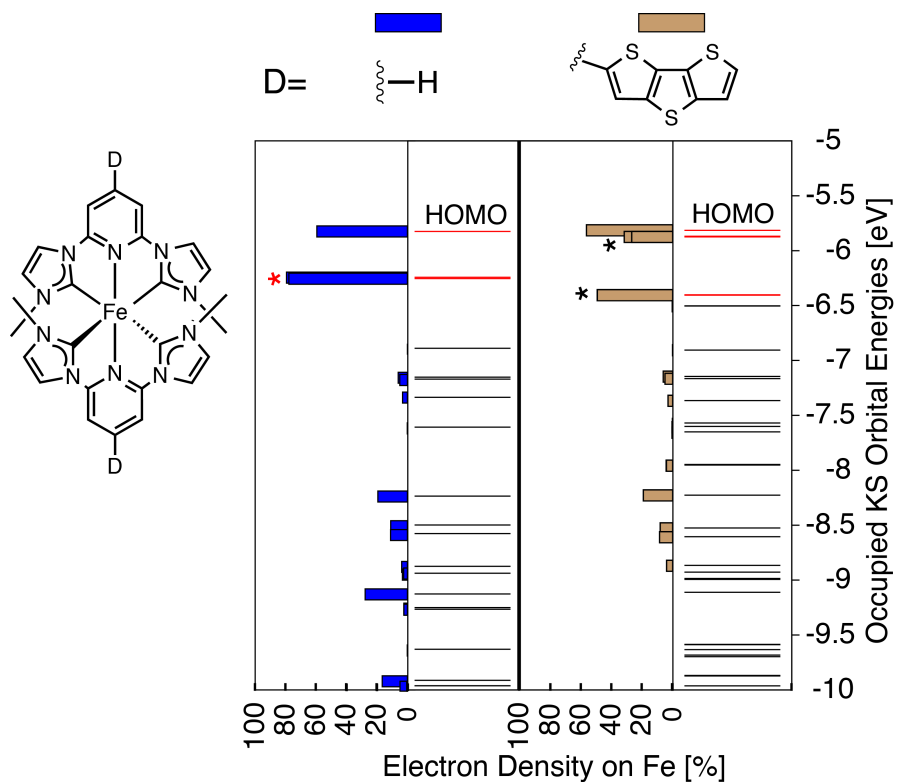

**Figure S30.** Electron density on Fe ( $\rho^{\text{Fe}}$ ) of the 21 higher energy occupied orbitals near the frontier region for  $[\text{Fe}(\text{CNC})_2]^{2+}$  and the complex with conjugated thiophene substituent on 4' position of CNC. The KS orbitals with electron distribution  $\geq 20\%$  are shown in red and among these the doubly degenerate orbitals are labeled as '\*'. The red '\*' indicates energy levels with difference in energy by 0.01 eV.
